# Supplementary material
Source: Springer Nature journal article supplement (https://www.springermedizin.de/resource/supplementary/13229_2014_141_MOESM3_ESM.pdf/9676280)

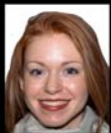

+

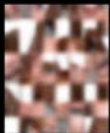

+

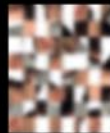

+

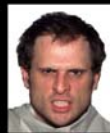

80 ms

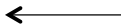

response

1300-1500 ms

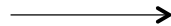

80 ms

Supplement: MOESM3 [file 9676280]
